# Supplementary material for: Antecedents and Consequences of Health Literacy among Refugees and Migrants during the First Two Years of COVID-19: A Scoping Review
Source: MDPI journal article supplement (doi:10.3390/tropicalmed9050116), 2024-05-16
Supplement: s1 [file s1]

## Supplementary File S2 – Search Strategy

| Search | Search term                                                                                                                                                                                                                                                    |
|--------|----------------------------------------------------------------------------------------------------------------------------------------------------------------------------------------------------------------------------------------------------------------|
| #1     | (MM "Health Literacy") OR (MM "Health Education") OR "health communication" OR (MM "Health Behavior") OR (MH "Consumer Health Information") OR (MM "Health Knowledge")                                                                                         |
| #2     | TI ( health n3 ( literacy or education or knowledge or communication or behavi?r or information or competence or promotion) ) OR AB ( health n3 ( literacy or education or knowledge or communication or behavi?r or information or competence or promotion) ) |
| #3     | TI ( e-health literacy or ehealth literacy or consumer health information or medical information ) OR AB ( e-health literacy or ehealth literacy or consumer health information or medical information )                                                       |
| #4     | TI health knowledge, attitudes, practice OR AB health knowledge, attitudes, practice                                                                                                                                                                           |
| #5     | #1 OR #2 OR #3 OR #4                                                                                                                                                                                                                                           |
| #6     | TX migrant* or emigrants AND immigrants or immigrant or transients AND migrants or refugee* or asylum* or minority groups or ethnic groups or ethnicity or migrat* or emigrant* or emigrat* or immigrat*                                                       |
| #7     | TX nCov-2019 or 2019nCov or 2019ncov or novel coronavirus                                                                                                                                                                                                      |
| #8     | TX Covid-19 or covid 19 or SARs-COV-2 or covid19 or coronavirus                                                                                                                                                                                                |
| #9     | #7 OR #8                                                                                                                                                                                                                                                       |
| #10    | #5 AND #6 AND #9                                                                                                                                                                                                                                               |
