# Supplementary material for: Antecedents and Consequences of Health Literacy among Refugees and Migrants during the First Two Years of COVID-19: A Scoping Review
Source: Trop Med Infect Dis. 2024 May 16;9(5):116. doi: 10.3390/tropicalmed9050116 (PMC11126087; doi:10.3390/tropicalmed9050116)
Supplement: Supplementary file 1 [file tropicalmed-09-00116-s001.zip]

Archive with 6 entries (6 files):
- Supplemenatry File S1 PRISMA ScR checklist.pdf
- Supplementary File S2 Search Strategy.pdf
- Supplementary File S3 societal determinants.pdf
- Supplementary file S4 Personal Determinants.pdf
- Supplementary File S5 Situational Determinants.pdf
- Supplementary file S6.pdf
