# Supplementary figures and images for: Antecedents and Consequences of Health Literacy among Refugees and Migrants during the First Two Years of COVID-19: A Scoping Review
Source: MDPI journal article supplement (doi:10.3390/tropicalmed9050116), 2024-05-16

Figure S1 – PRISMA-ScR Flow Diagram (30)

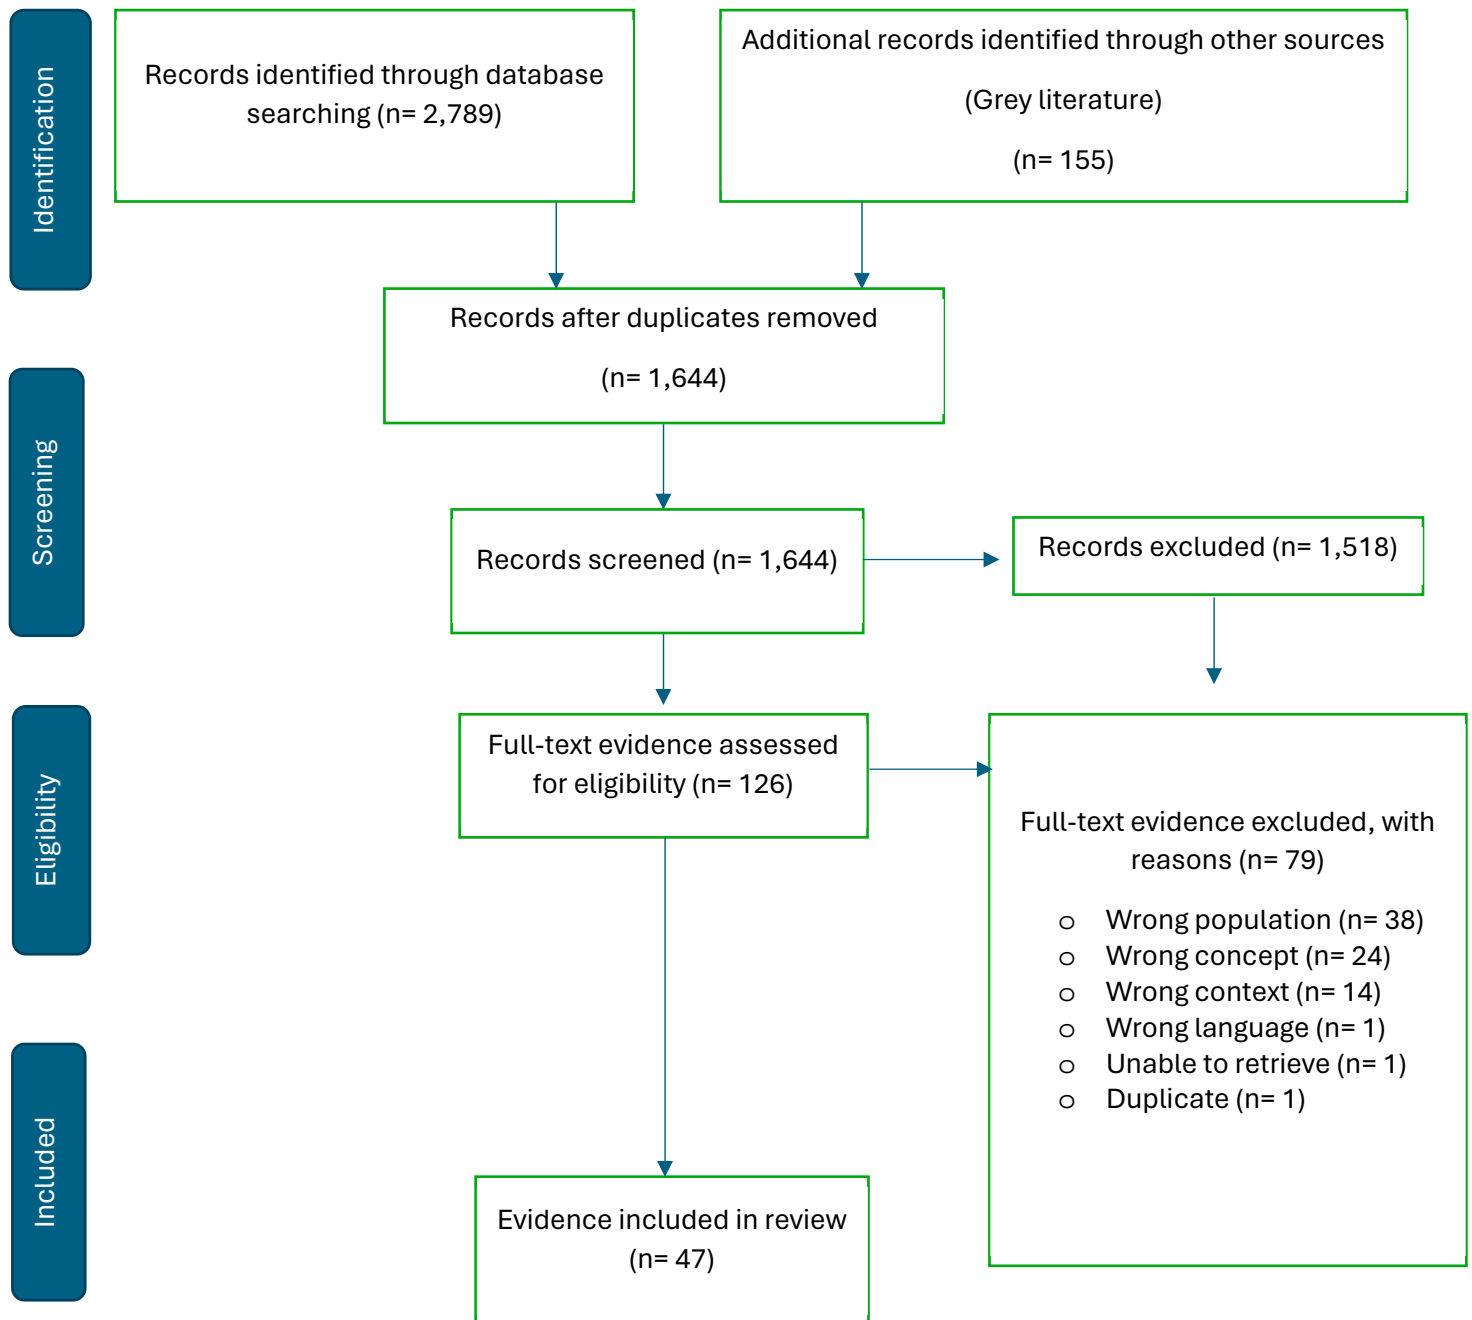

Supplement: s1 [file s1]
